# Supplementary figures and images for: Multimodule characterization of immune subgroups in intrahepatic cholangiocarcinoma reveals distinct therapeutic vulnerabilities
Source: HighWire-hosted journal article supplement (doi:10.1136/jitc-2022-004892), 2022-07-01

Fig. S6

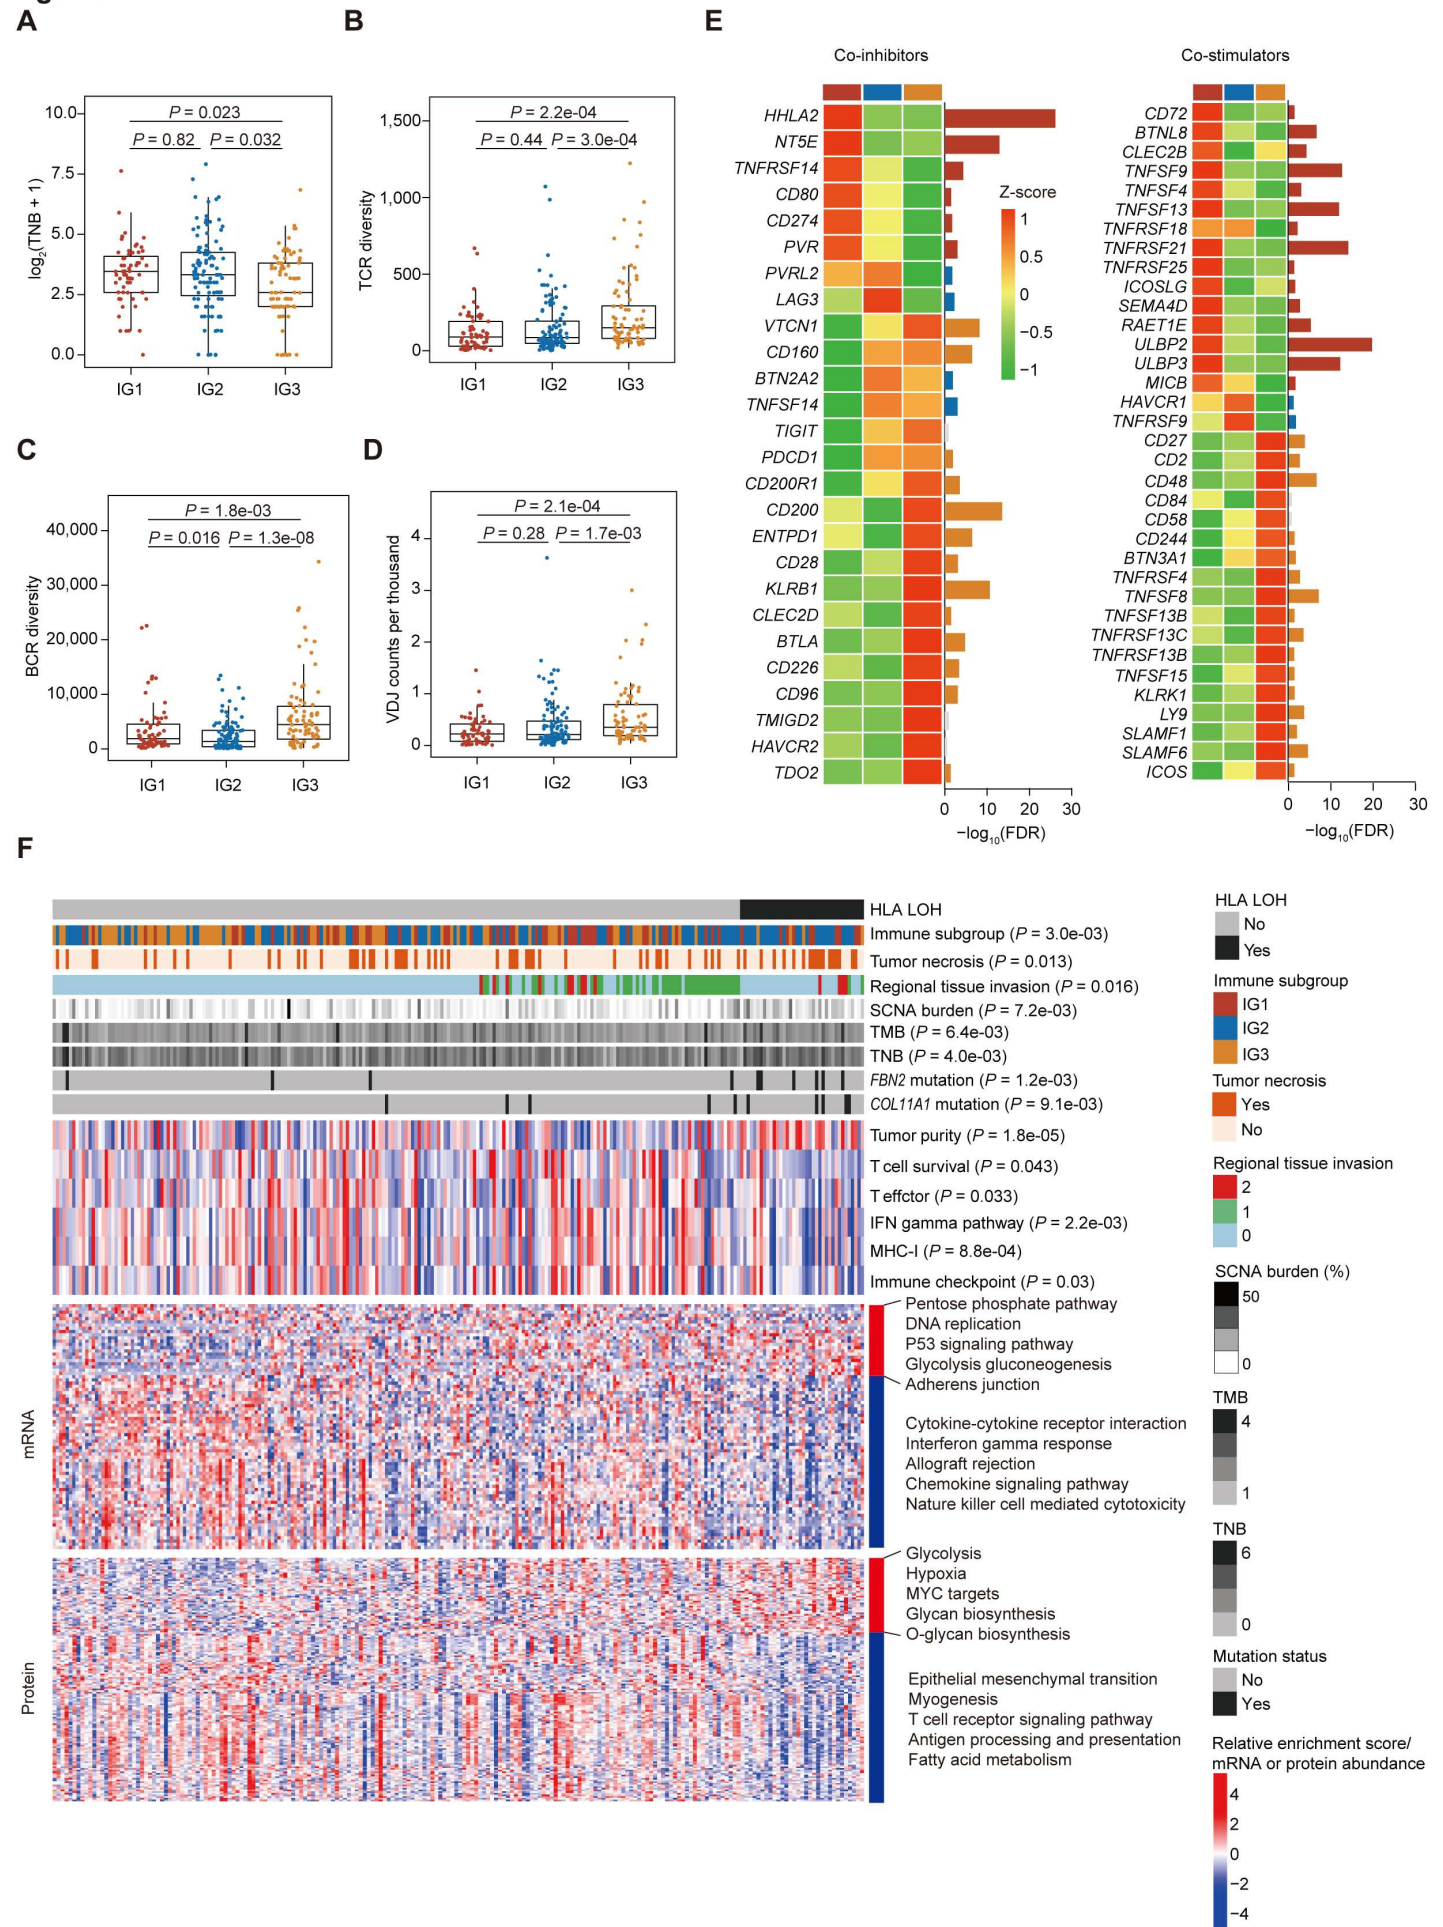

Supplement: jitc-2022-004892supp011_data_supplement.pdf [file jitc-2022-004892supp011_data_supplement.pdf]

Fig. S8

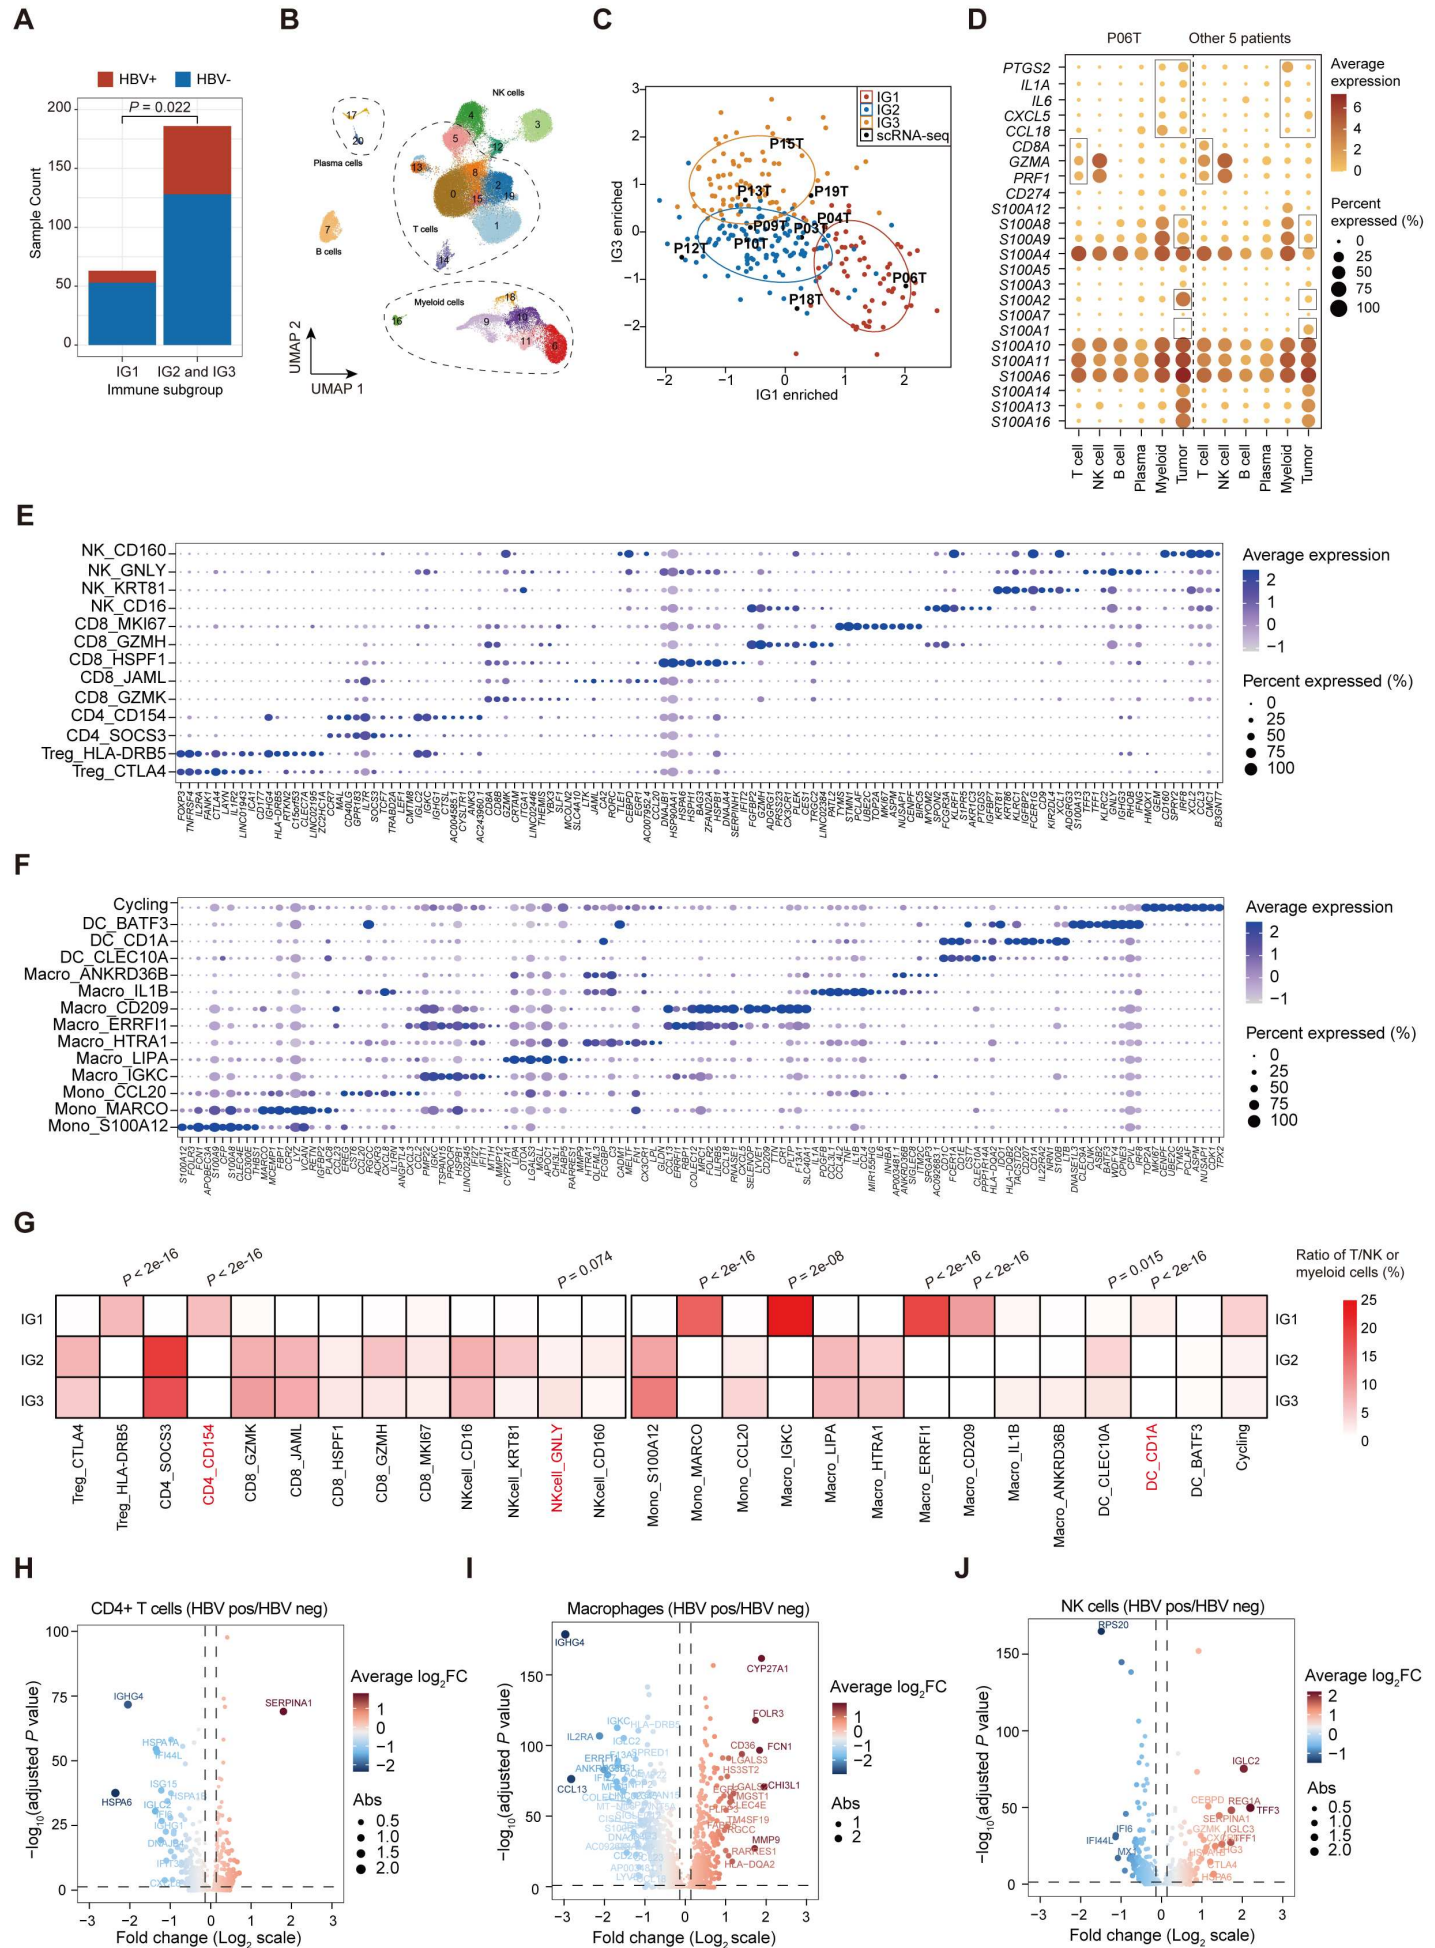

Supplement: jitc-2022-004892supp014_data_supplement.pdf [file jitc-2022-004892supp014_data_supplement.pdf]

**Fig. S2**

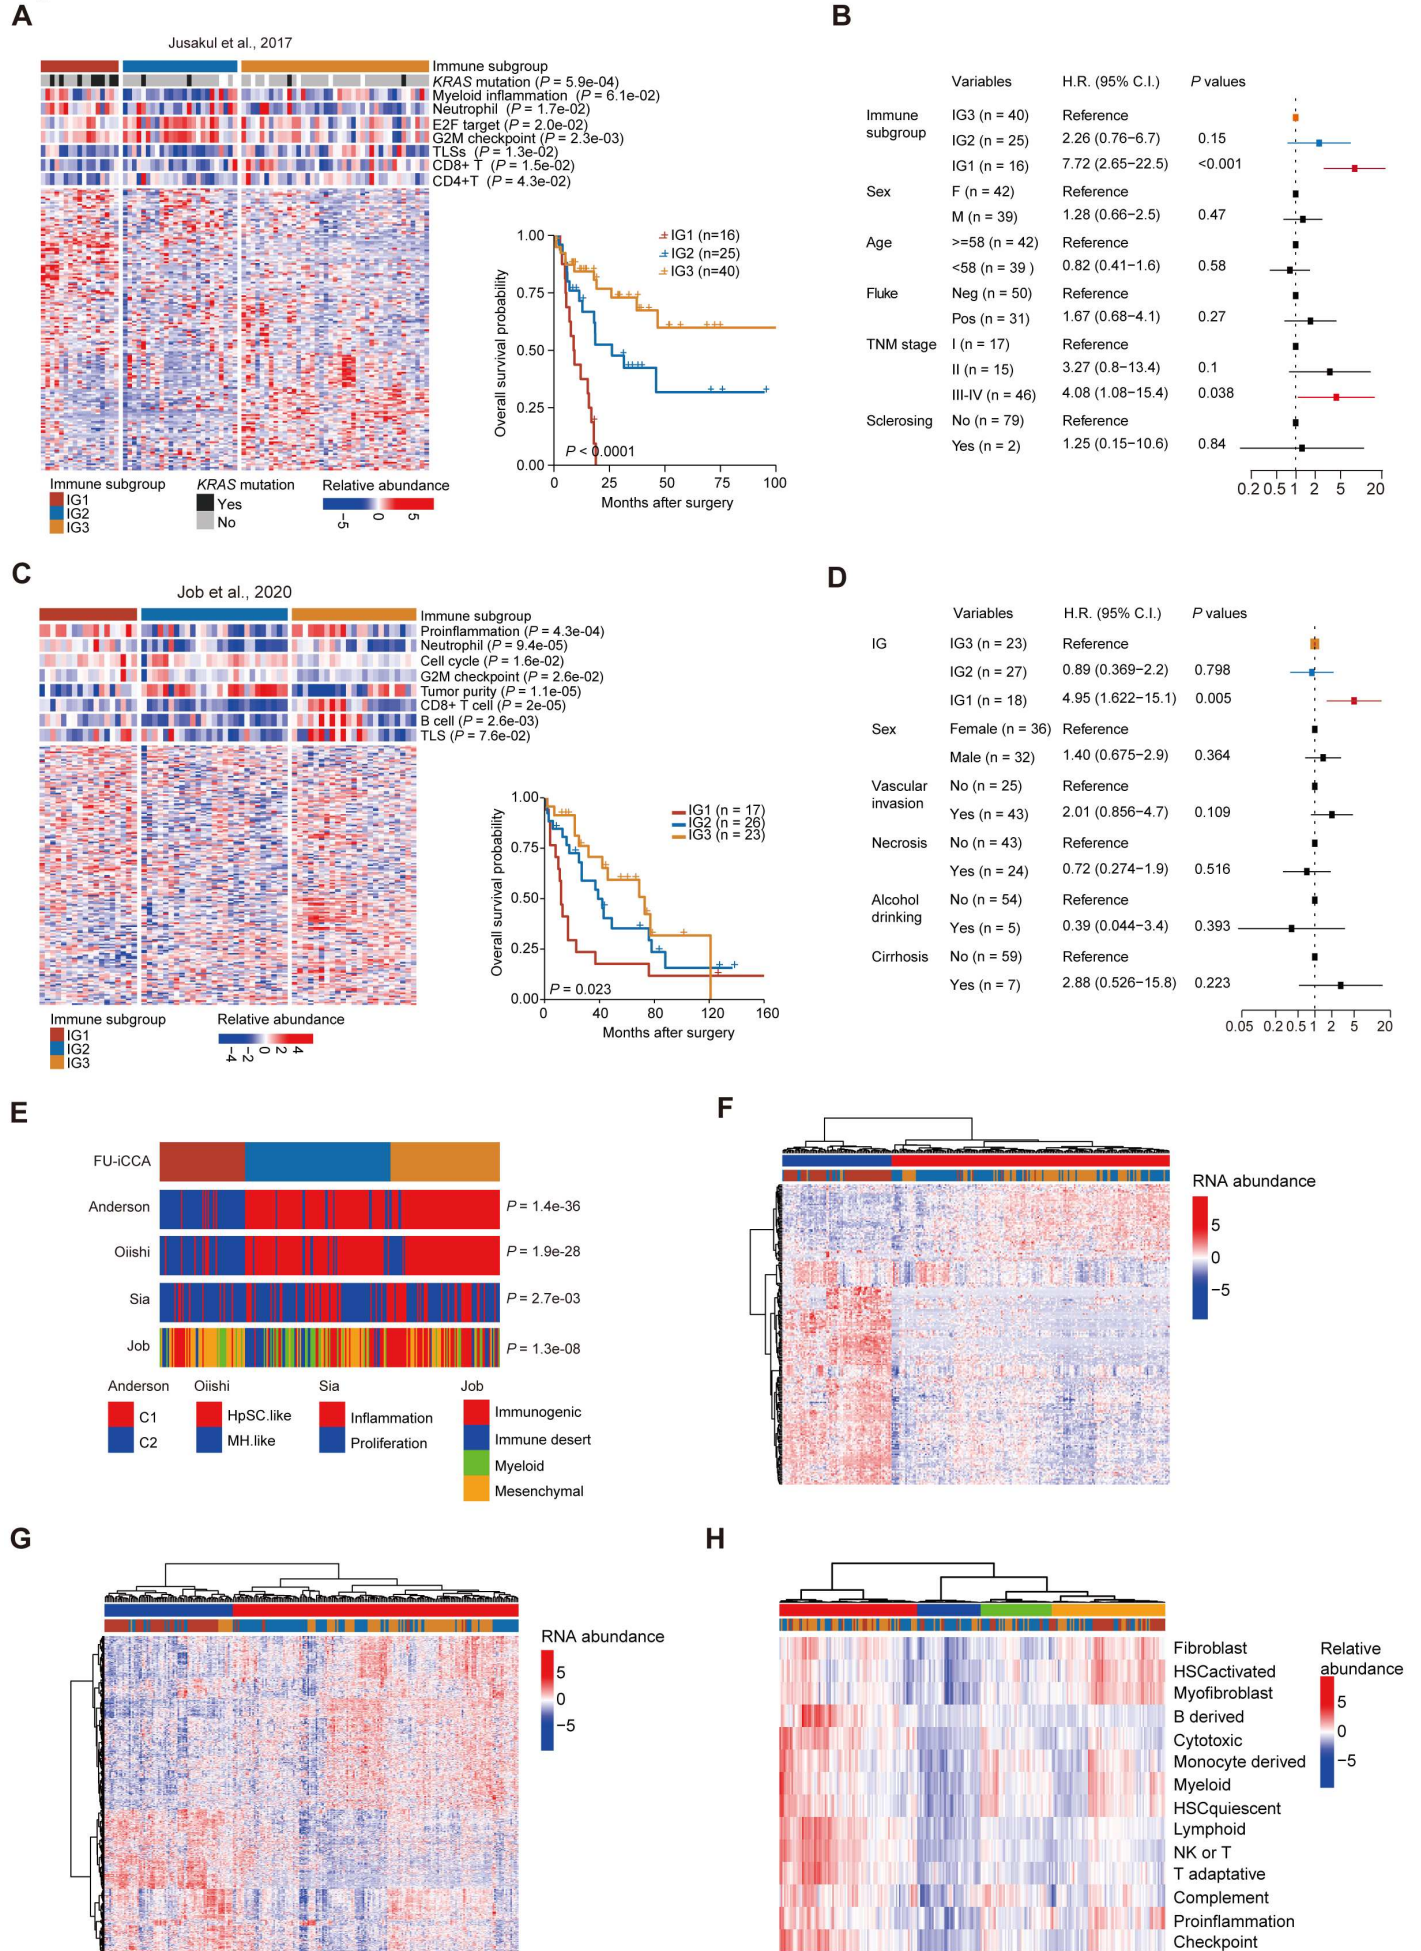

Supplement: jitc-2022-004892supp004_data_supplement.pdf [file jitc-2022-004892supp004_data_supplement.pdf]

Fig. S3

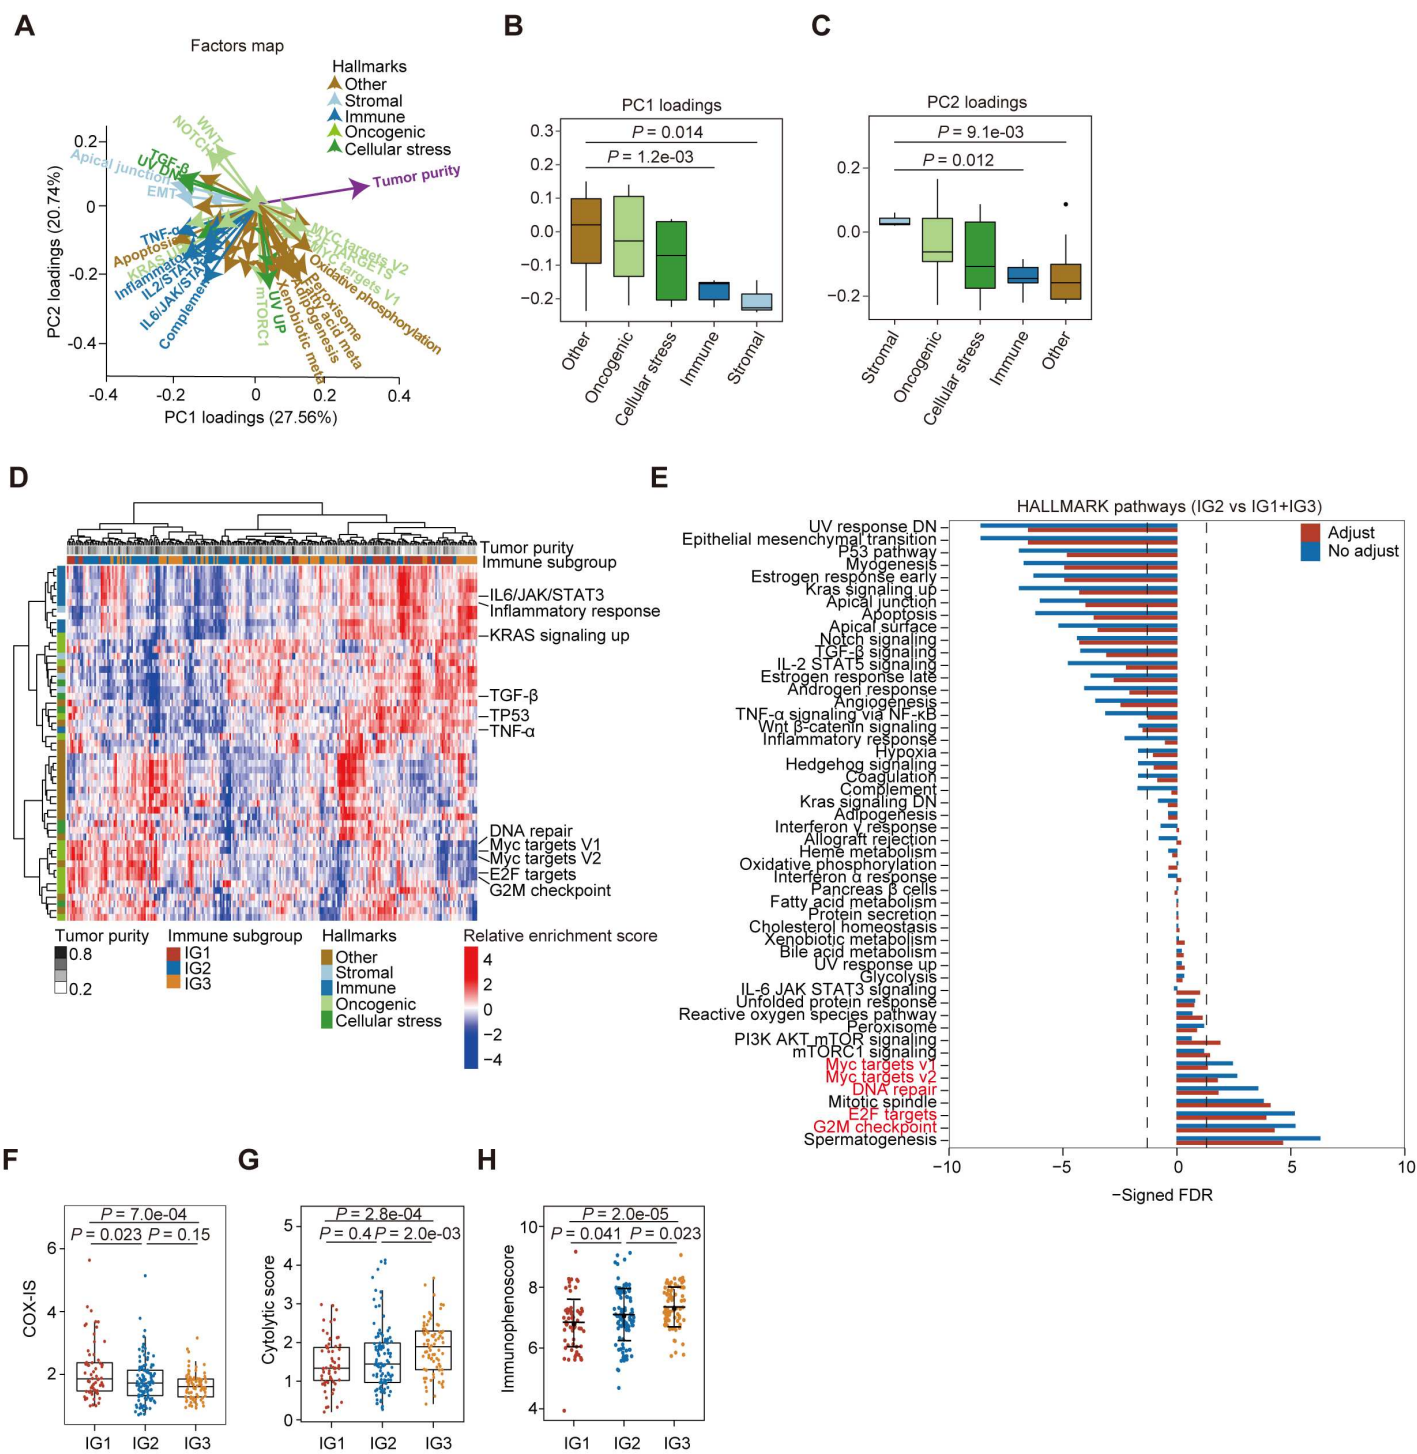

Supplement: jitc-2022-004892supp005_data_supplement.pdf [file jitc-2022-004892supp005_data_supplement.pdf]

Fig. S5

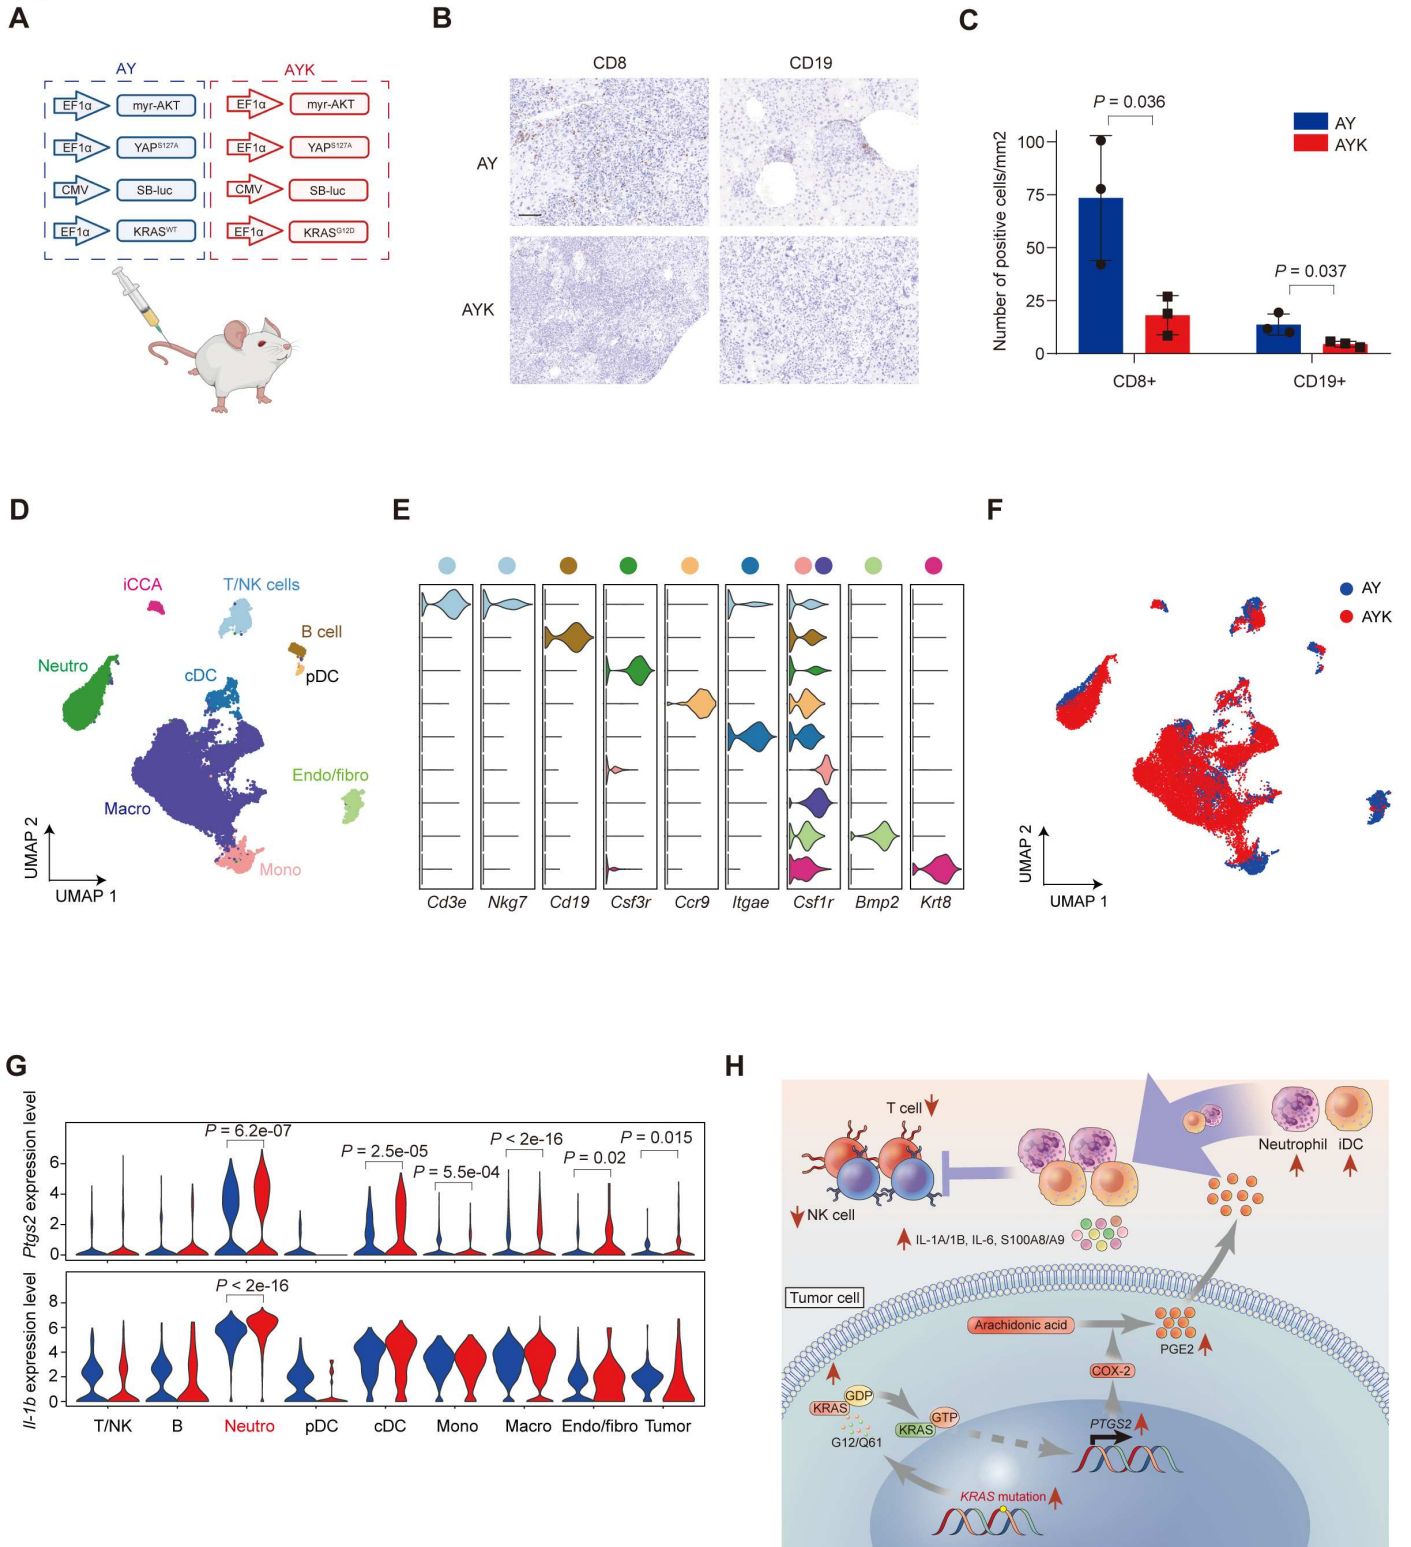

Supplement: jitc-2022-004892supp009_data_supplement.pdf [file jitc-2022-004892supp009_data_supplement.pdf]
